# Supplementary material for: Na,K-ATPase Acts as a Beta-Amyloid Receptor Triggering Src Kinase Activation
Source: Cells. 2022 Sep 3;11(17):2753. doi: 10.3390/cells11172753 (PMC9455167; doi:10.3390/cells11172753)
Supplement: Supplementary file 1 [file cells-11-02753-s001.zip]

Archive with 4 entries (4 files):
- Movie_S1A.mp4
- Movie_S1B.mp4
- Movie_S1C.mp4
- Supplementary file.pdf
